# Supplementary material
Source: PubMed Central journal article supplement (PMC2637022)

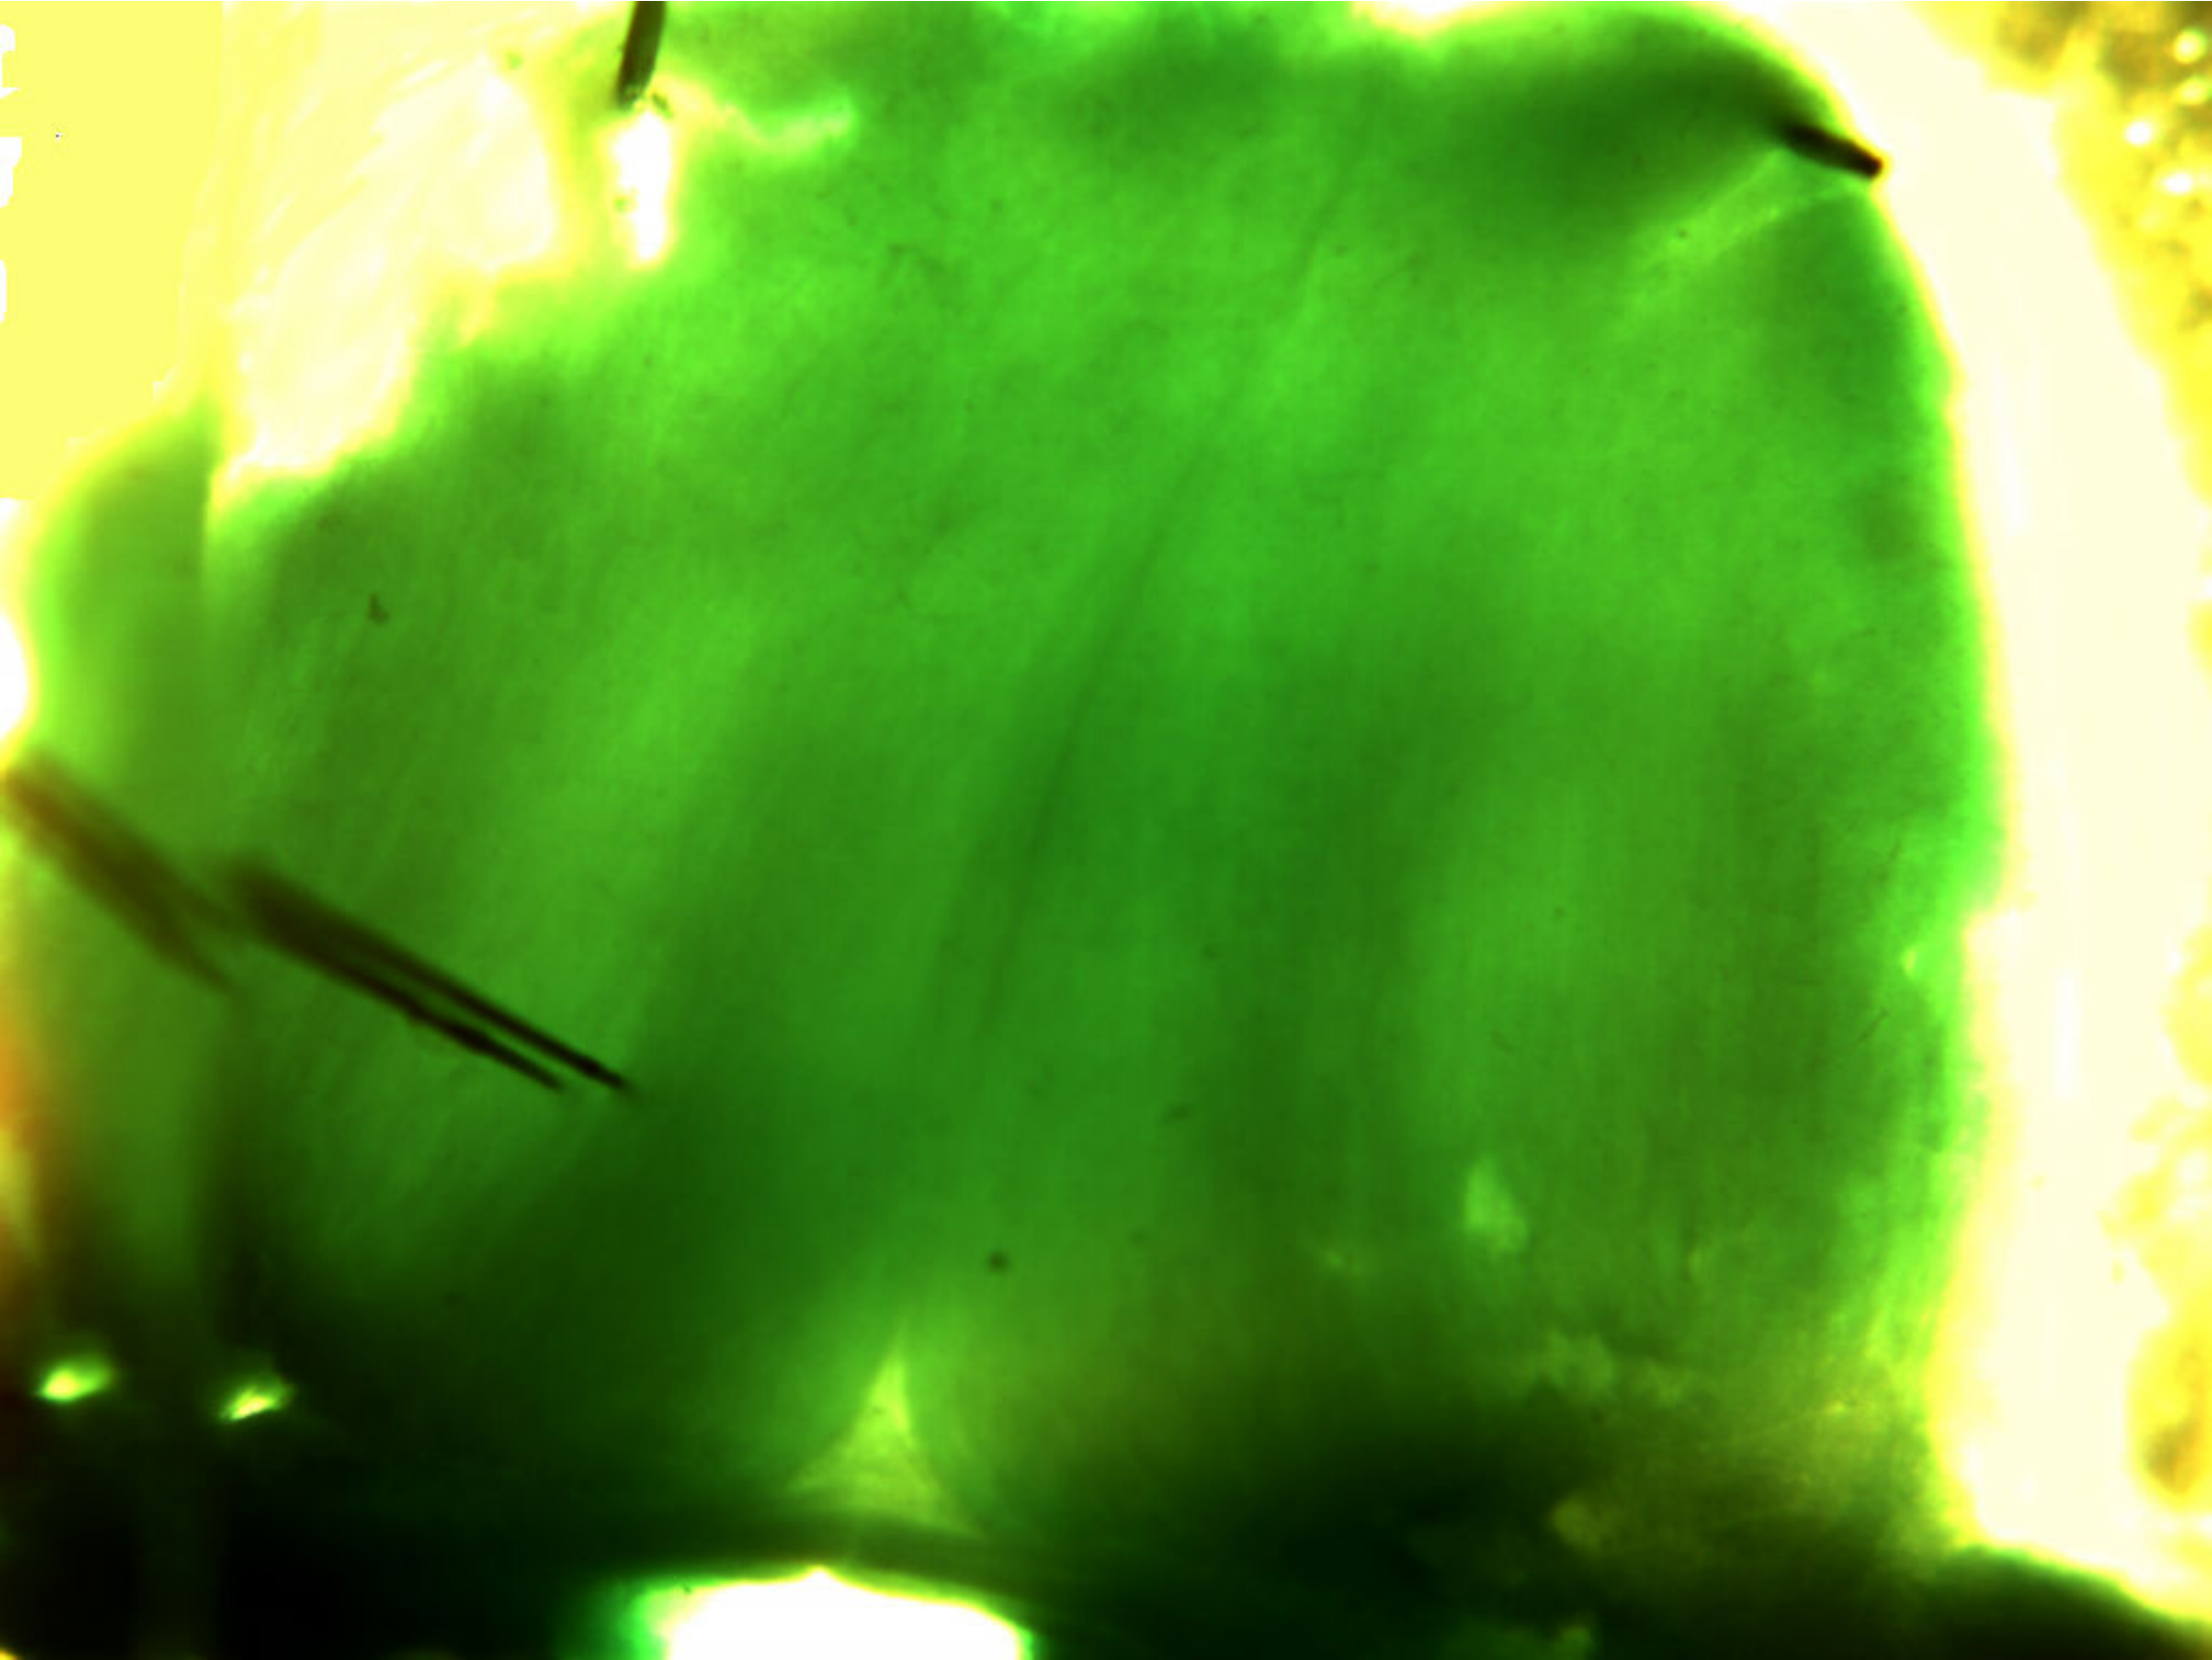

Supplement: supp_90766.2008_suppfig4C.pdf [file supp_90766.2008_suppfig4C.pdf]
